# Supplementary material
Source: PubMed Central journal article supplement (PMC7270584)
Supplement: mmc1.pdf [file mmc1.pdf]

# THE LANCET

## Supplementary appendix

This appendix formed part of the original submission. We post it as supplied by the authors.

Supplement to: Baker T, Schell CO, Petersen DB, et al. Essential care of critical illness must not be forgotten in the COVID-19 pandemic. *Lancet* 2020; published online April 1. [http://dx.doi.org/10.1016/S0140-6736\(20\)30793-5](http://dx.doi.org/10.1016/S0140-6736(20)30793-5).

**Figure: conceptual framework for essential care of critical illness (modified from Schell et al 2018)**

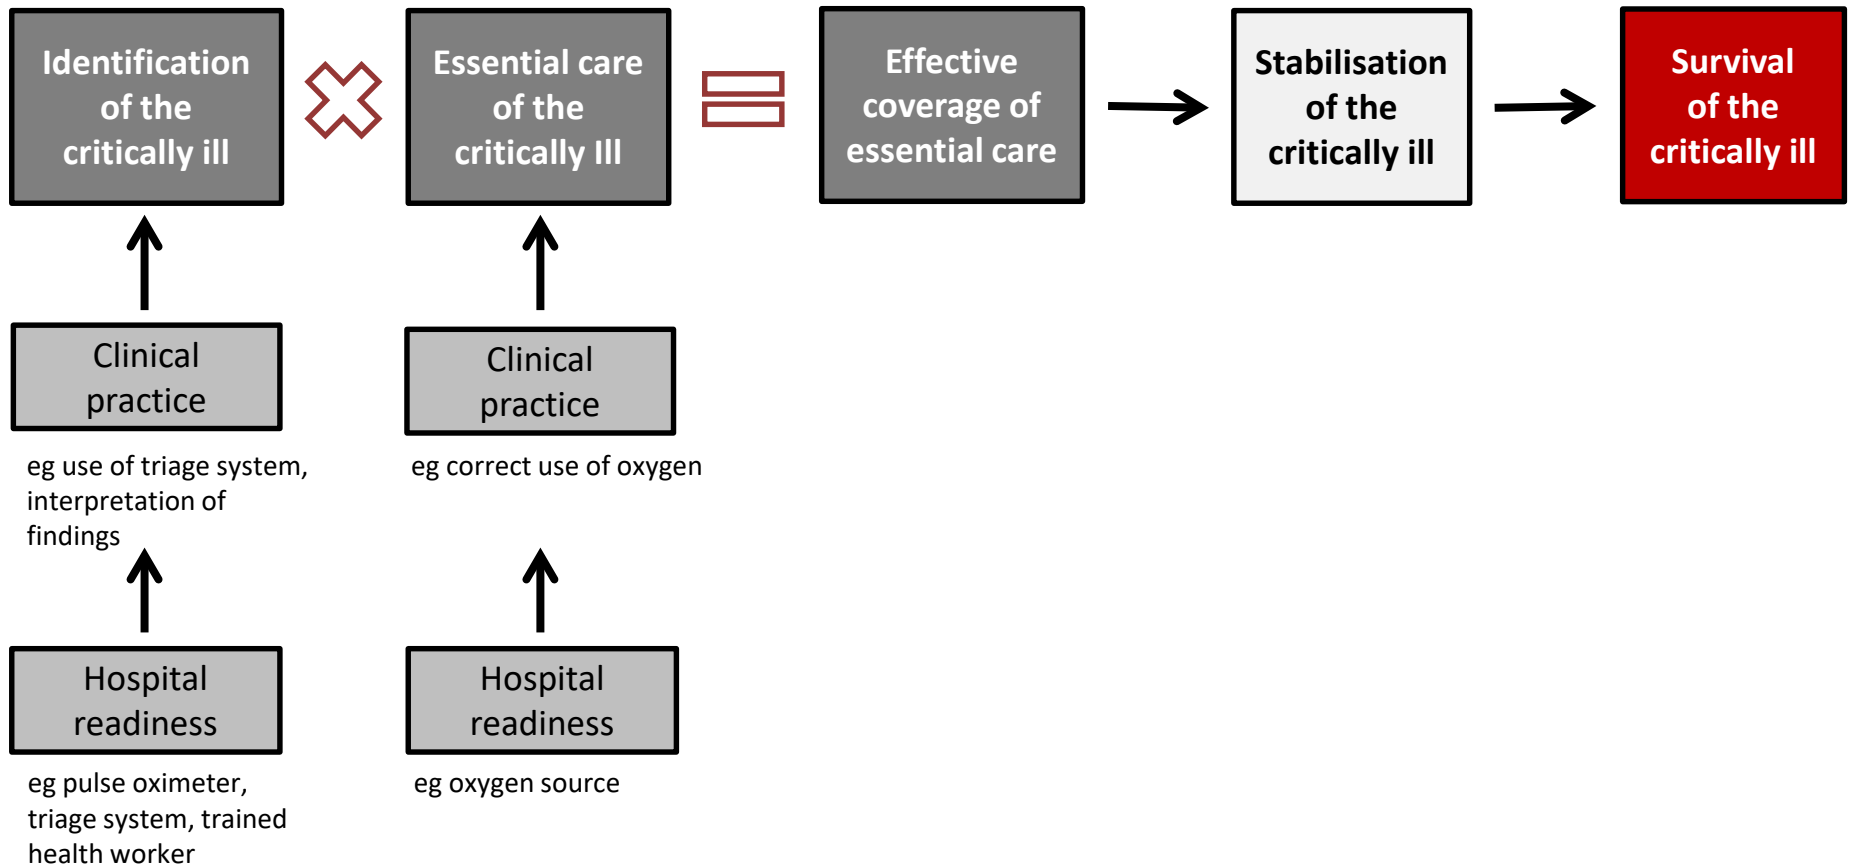

Schell CO, Gerdin Wärnberg M, Hvarfner A, et al. The global need for essential emergency and critical care. *Critical Care* 2018; **22**(1): 284.
